# Supplementary material for: SERPINB1 expression is predictive for sensitivity and outcome of cisplatin-based chemotherapy in melanoma
Source: PubMed Central journal article supplement (PMC4891108; doi:10.18632/oncotarget.6956), 2016-01-20
Supplement: oncotarget-07-10117-s001.pdf [file oncotarget-07-10117-s001.pdf]

## SERPINB1 expression is predictive for sensitivity and outcome of cisplatin-based chemotherapy in melanoma

### Supplementary Materials

**Supplementary Table S1: Down-regulated genes in chemotherapy responders versus non-responders**

| Probe set ID | Full name of gene                                                                   | Gene symbol       | Fold change |
|--------------|-------------------------------------------------------------------------------------|-------------------|-------------|
| 205694_at    | tyrosinase-related protein 1                                                        | <i>TYRP1</i>      | 54, 2       |
| 213712_at    | elongation of very long chain fatty acids-like 2                                    | <i>ELOVL2</i>     | 25, 3       |
| 219263_at    | ring finger protein 128                                                             | <i>RNF128</i>     | 21, 1       |
| 206786_at    | histatin 3 / cingulin-like 1                                                        | <i>HTN3/CGNL1</i> | 17, 5       |
| 219159_s_at  | SLAM family member 7                                                                | <i>SLAMF7</i>     | 17, 2       |
| 211470_s_at  | sulfotransferase family, cytosolic, 1C, member 1                                    | <i>SULT1C1</i>    | 16, 6       |
| 206893_at    | sal-like 1 (Drosophila)                                                             | <i>SALL1</i>      | 13, 5       |
| 205342_s_at  | sulfotransferase family, cytosolic, 1C, member 1                                    | <i>SULT1C1</i>    | 12, 4       |
| 220116_at    | potassium intermediate/conductance calcium-activated channel, subfamily N, member 2 | <i>KCNN2</i>      | 10, 0       |
| 203680_at    | protein kinase, cAMP-dependent, regulatory, type II, beta                           | <i>PRKAR2B</i>    | 9, 1        |
| 210372_s_at  | tumor protein D52-like 1                                                            | <i>TPD52L1</i>    | 8, 3        |
| 222361_at    | Tubulin, beta 8                                                                     | <i>TUBB8</i>      | 7, 6        |
| 218816_at    | leucine rich repeat containing 1                                                    | <i>LRRC1</i>      | 7, 2        |
| 204947_at    | E2F transcription factor 1                                                          | <i>E2F1</i>       | 6, 7        |
| 220234_at    | carbonic anhydrase VIII                                                             | <i>CA8</i>        | 6, 1        |
| 202094_at    | baculoviral IAP repeat-containing 5 (survivin)                                      | <i>BIRC5</i>      | 5, 3        |
| 210145_at    | phospholipase A2, group IVA (cytosolic, calcium-dependent)                          | <i>PLA2G4A</i>    | 5, 2        |
| 220954_s_at  | paired immunoglobulin-like type 2 receptor beta                                     | <i>PILRB</i>      | 5, 1        |
| 201998_at    | ST6 beta-galactosamide alpha-2,6-sialyltransferase 1                                | <i>ST6GAL1</i>    | 5, 0        |
| 202870_s_at  | CDC20 cell division cycle 20 homolog (S. cerevisiae)                                | <i>CDC20</i>      | 4, 9        |
| 209621_s_at  | PDZ and LIM domain 3                                                                | <i>PDLIM3</i>     | 4, 8        |
| 212094_at    | paternally expressed 10                                                             | <i>PEG10</i>      | 4, 8        |
| 202743_at    | phosphoinositide-3-kinase, regulatory subunit 3 (p55, gamma)                        | <i>PIK3R3</i>     | 4, 7        |
| 219217_at    | hypothetical protein FLJ23441                                                       | <i>FLJ23441</i>   | 4, 7        |
| 209569_x_at  | DNA segment on chromosome 4, 234 expressed sequence                                 | <i>D4S234E</i>    | 4, 6        |
| 221436_s_at  | cell division cycle associated 3                                                    | <i>CDCA3</i>      | 4, 6        |
| 208089_s_at  | tudor domain containing 3                                                           | <i>TDRD3</i>      | 4, 5        |
| 210983_s_at  | MCM7 minichromosome maintenance deficient 7                                         | <i>MCM7</i>       | 4, 4        |
| 220615_s_at  | male sterility domain containing 1                                                  | <i>MLSTD1</i>     | 4, 2        |
| 203775_at    | solute carrier family 25, member 13 (citrin)                                        | <i>SLC25A13</i>   | 4, 2        |
| 216860_s_at  | growth differentiation factor 11                                                    | <i>GDF11</i>      | 4, 1        |
| 210233_at    | interleukin 1 receptor accessory protein                                            | <i>IL1RAP</i>     | 4, 1        |
| 211732_x_at  | histamine N-methyltransferase                                                       | <i>HNMT</i>       | 4, 1        |
| 219148_at    | PDZ binding kinase                                                                  | <i>PBK</i>        | 4, 0        |

|             |                                                             |                 |      |
|-------------|-------------------------------------------------------------|-----------------|------|
| 202095_s_at | baculoviral IAP repeat-containing 5 (survivin)              | <i>BIRC5</i>    | 3, 9 |
| 209172_s_at | centromere protein F, 350/400ka (mitosin)                   | <i>CENPF</i>    | 3, 8 |
| 202580_x_at | forkhead box M1                                             | <i>FOXM1</i>    | 3, 8 |
| 210334_x_at | baculoviral IAP repeat-containing 5 (survivin)              | <i>BIRC5</i>    | 3, 8 |
| 203755_at   | BUB1 budding uninhibited by benzimidazoles 1 homolog beta   | <i>BUB1B</i>    | 3, 8 |
| 218281_at   | mitochondrial ribosomal protein L48                         | <i>MRPL48</i>   | 3, 7 |
| 205048_s_at | phosphoserine phosphatase                                   | <i>PSPH</i>     | 3, 7 |
| 219763_at   | DENN/MADD domain containing 1A                              | <i>DENND1A</i>  | 3, 7 |
| 203510_at   | met proto-oncogene (hepatocyte growth factor receptor)      | <i>MET</i>      | 3, 7 |
| 203358_s_at | enhancer of zeste homolog 2 (Drosophila)                    | <i>EZH2</i>     | 3, 6 |
| 219372_at   | carnitine deficiency-associated, expressed in ventricle 1   | <i>CDV1</i>     | 3, 6 |
| 204822_at   | TTK protein kinase                                          | <i>TTK</i>      | 3, 5 |
| 202589_at   | thymidylate synthetase                                      | <i>TYMS</i>     | 3, 4 |
| 219978_s_at | nucleolar and spindle associated protein 1                  | <i>NUSAP1</i>   | 3, 4 |
| 201890_at   | ribonucleotide reductase M2 polypeptide                     | <i>RRM2</i>     | 3, 4 |
| 214581_x_at | tumor necrosis factor receptor superfamily, member 21       | <i>TNFRSF21</i> | 3, 4 |
| 210074_at   | cathepsin L2                                                | <i>CTSL2</i>    | 3, 3 |
| 219537_x_at | delta-like 3 (Drosophila)                                   | <i>DLL3</i>     | 3, 3 |
| 202954_at   | ubiquitin-conjugating enzyme E2C                            | <i>UBE2C</i>    | 3, 3 |
| 201291_s_at | topoisomerase (DNA) II alpha 170kDa                         | <i>TOP2A</i>    | 3, 3 |
| 218663_at   | chromosome condensation protein G                           | <i>HCAP-G</i>   | 3,3  |
| 210999_s_at | growth factor receptor-bound protein 10                     | <i>GRB10</i>    | 3, 2 |
| 204170_s_at | CDC28 protein kinase regulatory subunit 2                   | <i>CKS2</i>     | 3, 2 |
| 218755_at   | kinesin family member 20A                                   | <i>KIF20A</i>   | 3, 1 |
| 210052_s_at | TPX2, microtubule-associated, homolog (Xenopus laevis)      | <i>TPX2</i>     | 3, 1 |
| 205761_s_at | dihydrouridine synthase 4-like (S. cerevisiae)              | <i>DUS4L</i>    | 3, 0 |
| 208079_s_at | serine/threonine kinase 6                                   | <i>STK6</i>     | 3, 0 |
| 210720_s_at | amyloid beta (A4) precursor protein-binding, family A       | <i>APBA2BP</i>  | 2, 9 |
| 32502_at    | glycerophosphodiester phosphodiesterase domain containing 5 | <i>GDPD5</i>    | 2, 9 |
| 201259_s_at | synaptophysin-like 1                                        | <i>SYPL1</i>    | 2, 9 |
| 201774_s_at | chromosome condensation-related SMC-associated protein 1    | <i>CNAP1</i>    | 2, 8 |
| 201292_at   | topoisomerase (DNA) II alpha 170kDa                         | <i>TOP2A</i>    | 2, 7 |
| 204112_s_at | histamine N-methyltransferase                               | <i>HNMT</i>     | 2, 7 |
| 203764_at   | discs, large homolog 7 (Drosophila)                         | <i>DLG7</i>     | 2, 7 |
| 201271_s_at | RNA binding protein, autoantigenic                          | <i>RALY</i>     | 2, 7 |
| 204318_s_at | G-2 and S-phase expressed 1                                 | <i>GTSE1</i>    | 2, 7 |
| 200790_at   | ornithine decarboxylase 1                                   | <i>ODC1</i>     | 2, 6 |
| 207828_s_at | centromere protein F, 350/400ka (mitosin)                   | <i>CENPF</i>    | 2, 5 |
| 222077_s_at | Rac GTPase activating protein 1                             | <i>RACGAP1</i>  | 2, 5 |
| 203564_at   | Fanconi anemia, complementation group G                     | <i>FANCG</i>    | 2, 4 |
| 219119_at   | LSM8 homolog, U6 small nuclear RNA associated               | <i>LSM8</i>     | 2, 4 |
| 203554_x_at | pituitary tumor-transforming 1                              | <i>PTTG1</i>    | 2, 3 |

Differential gene expression was quantified by Affymetrix microarray analysis of three melanoma cell lines derived from tissue biopsies from responders to chemotherapy as compared to three tumor cell lines derived from non-responders. Differentially expressed genes are sorted by fold change; only genes of > 2fold change are presented.

### A Patients with any type of therapy (n=112)

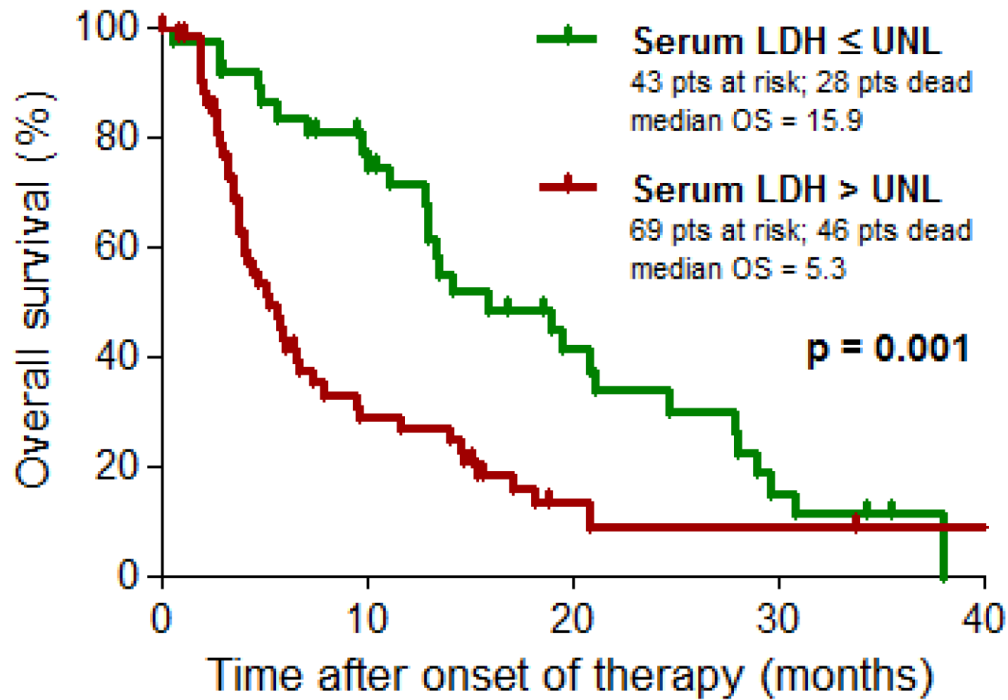

### B Patients with cisplatin-based chemotherapy (n=25)

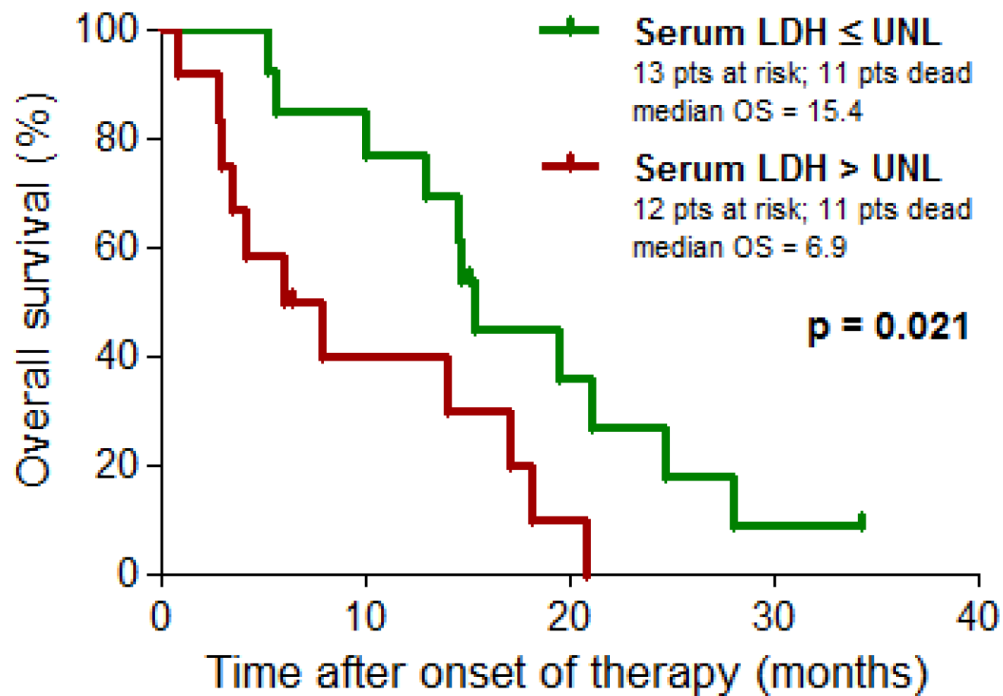

**Supplementary Figure S1: Serum LDH as a prognostic marker in metastatic melanoma independent of the mode of therapy.** Kaplan Meier plots depicting the probability of overall survival of (A) patients of validation set 1 ( $n = 112$ ; LDH serum values missing for 15 patients) including all types of therapy (chemotherapy, immunotherapy, other/supportive therapy), and (B) its subset of patients treated with a cisplatin-based chemotherapy regimen ( $n = 25$ ; LDH serum values missing for 2 patients). Differences between groups were calculated using the log rank test. Censored observations are indicated by vertical bars.
